# Supplementary material for: Viscoelastic properties of cell walls of single living plant cells determined by dynamic nanoindentation
Source: PubMed Central journal article supplement — J Exp Bot. 2012 Jan 30;63(7):2525–40. doi: 10.1093/jxb/err428 (PMC3346220; doi:10.1093/jxb/err428), 2012-01-30
Supplement: supp_err428_00067405-file001.pdf [file supp_err428_00067405-file001.pdf]

## **SUPPLEMENTAL FIGURES**

Viscoelastic Properties of Cell Walls of Single Living Plant Cells Determined by Dynamic Nanoindentation

Celine M. Hayot, Elham Forouzesh, Ashwani Goel, Zoya Avramova and Joseph A. Turner

A

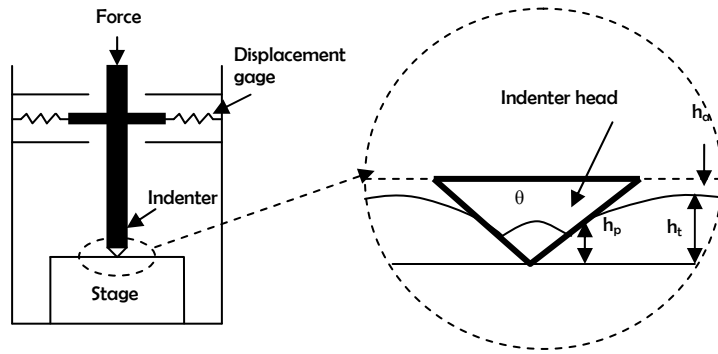

B

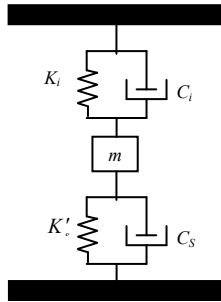

**Fig. S1** Schematic of the nanoindentation system and a Mechanical model for the dynamic behavior of the nanoindenter-sample system.

**A)** During testing, a force is applied on the indenter column, which drives the indenter tip into the specimen on the stage while the displacement of the indenter column is continuously monitored.  $h_a$  is the distance from the edge of the contact of the specimen surface,  $h_p$  is the contact depth,  $h_t$  is the depth from the original specimen surface and  $\theta$  is the face angle of the indenter.

**B)** The values of the spring stiffness,  $K_i$  and the damping,  $C_i$ , of the indenter instrument as well as the mass,  $m$  of the tip and shaft. The values of  $C_s$  and  $K'_s$  represent the mechanical analogs for the stiffness and the damping of interaction between the tip and the sample.

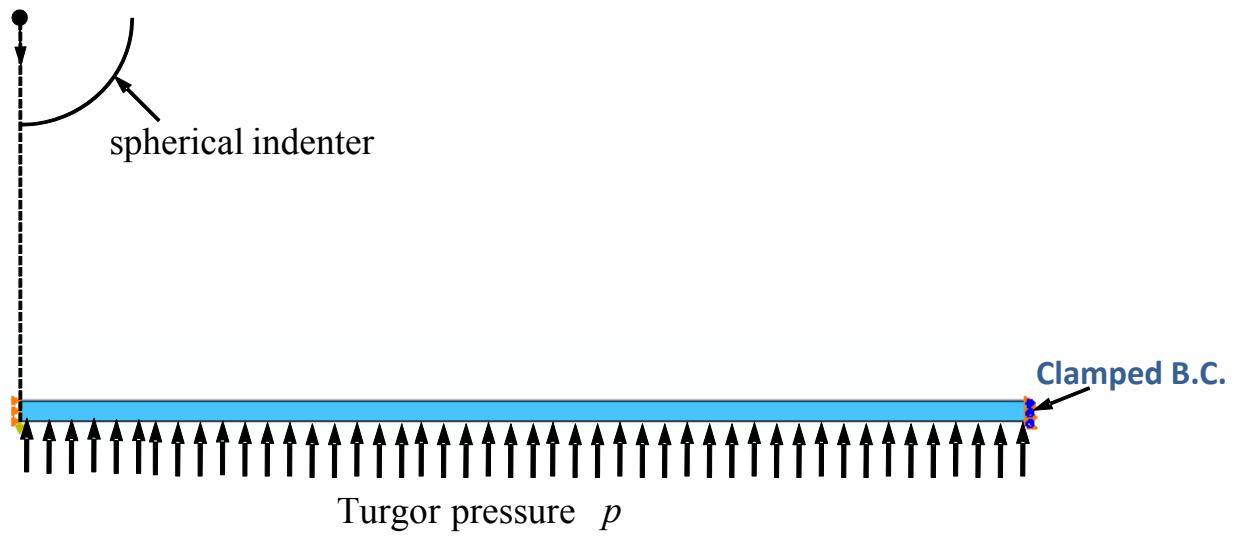

**Fig. S2** Finite element axisymmetric model for a plant cell wall subjected to turgor pressure and indentation load.

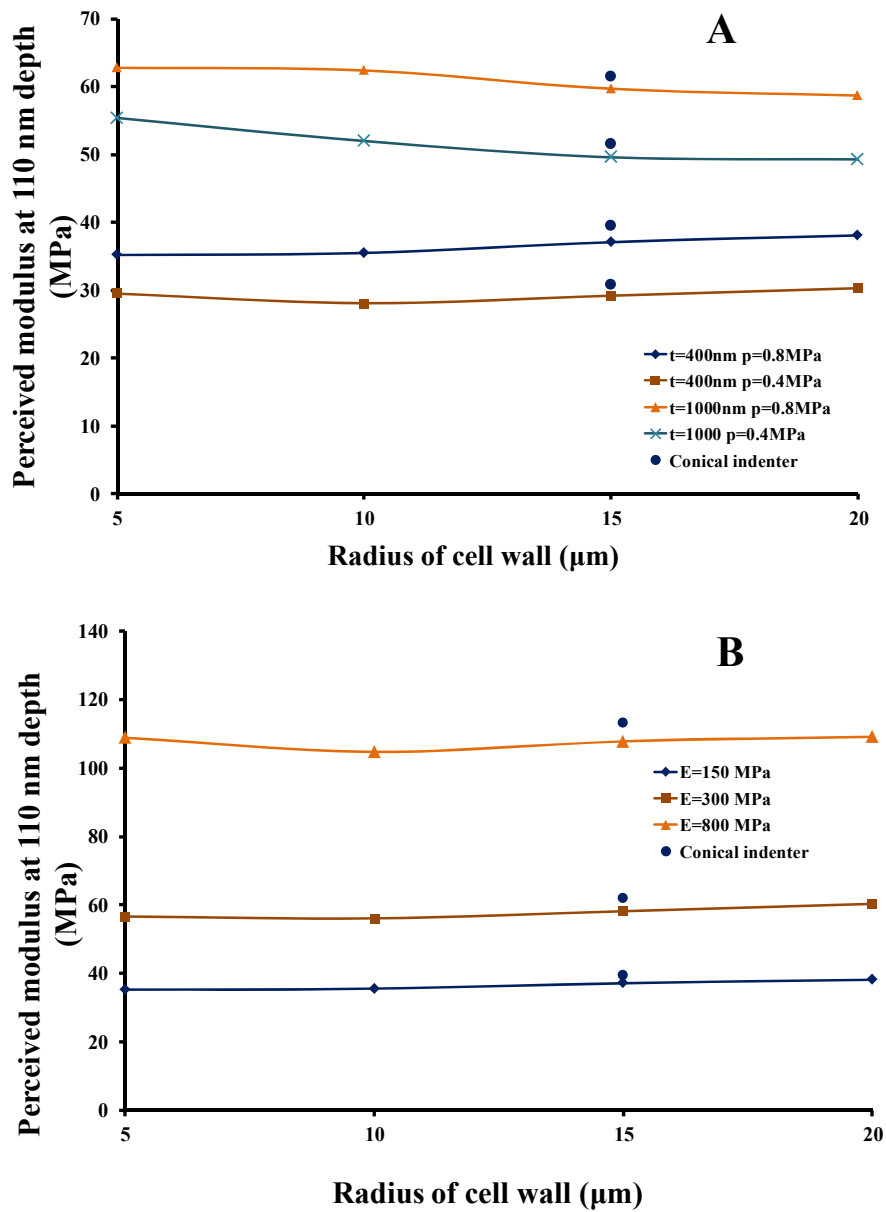

**Fig. S3** Perceived modulus at 110 nm depth as a function of the radius of the cell used for the finite element model for various values of thickness ( $t$ ) and pressure ( $p$ ), and wall modulus ( $E$ ) for both a conical (blue circles) and spherical indenter (all other symbols). In (a), wall modulus is fixed ( $E = 150$  MPa) while  $t$  and  $p$  are varied. In (b), thickness and pressure are fixed ( $t = 400$  nm;  $p = 0.8$  MPa) and modulus is varied. Note that the change with respect to cell radius is negligible in comparison with thickness or pressure. In addition, the change with respect to tip shape is less than 6 % as expected (Fischer-Cripps, 2004).

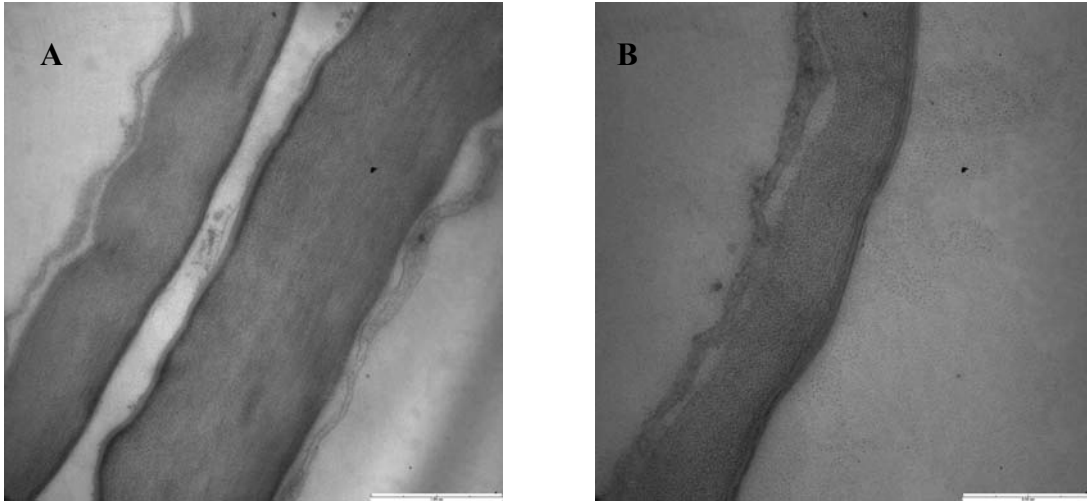

**Fig. S4** Transmission electron microscope (TEM) images: A) two adjacent walls of an old Columbia leaf (x 15k; the scale bar is 1  $\mu\text{m}$ ); B) wall of an old WS leaf (x 30k; the scale bar is 0.5  $\mu\text{m}$ ).

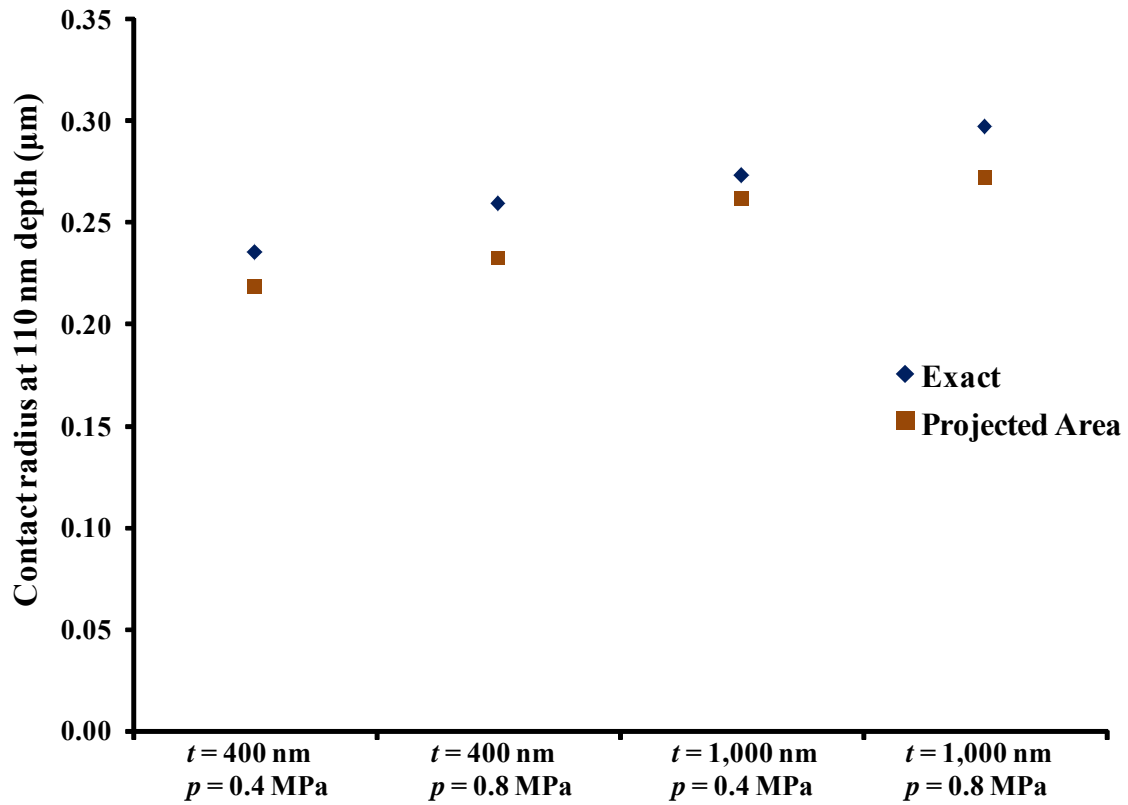

**Fig. S5** Contact radius for a spherical indenter at a depth of 110 nm as a function of turgor pressure ( $p$ ) and cell wall thickness ( $t$ ). The ‘exact’ result is the contact radius determined from the finite element simulations. The result for “projected-area approximation” is determined from the slope of the computational load-displacement curve as discussed in Fig. 8 (Oliver and Pharr, 1992). The contact radius differs by at most 9 % because the indentation depths used here are shallow.
